# Supplementary material for: New insights into diabetes mellitus and its complications: a narrative review
Source: PubMed Central journal article supplement — Ann Transl Med. 2020 Dec;8(24):1689. doi: 10.21037/atm-20-7243 (PMC7812242; doi:10.21037/atm-20-7243), 2020-12
Supplement: atm-08-24-1689-rc.pdf [file atm-08-24-1689-rc.pdf]

## Narrative Review Checklist

| Section/Topic             | Item No | Item                                                                                                                                                                                                                                                                                 | Reported on Page Number/Line Number | Reported on Section/Paragraph |
|---------------------------|---------|--------------------------------------------------------------------------------------------------------------------------------------------------------------------------------------------------------------------------------------------------------------------------------------|-------------------------------------|-------------------------------|
| <b>TITLE</b>              |         |                                                                                                                                                                                                                                                                                      |                                     |                               |
| Title                     | 1       | Identify the report as a Narrative Review of ...                                                                                                                                                                                                                                     | Page1/Line3                         | Title/Paragraph1              |
| <b>ABSTRACT</b>           |         |                                                                                                                                                                                                                                                                                      |                                     |                               |
| Unstructured summary      | 2       | Provide an unstructured summary including, as applicable: background, objective, brief summary of narrative review and implications for future research, and clinical practice or policy development.                                                                                | Page2/Line35-50                     | Abstract/Paragraph1           |
| <b>INTRODUCTION</b>       |         |                                                                                                                                                                                                                                                                                      |                                     |                               |
| Rationale/background      | 3       | Describe the rationale for the review in the context of what is already known.                                                                                                                                                                                                       | Page3-4/Line69-109                  | Introduction/Paragraph1-3     |
| Objectives                | 4       | Specify the key question(s) identified for the review topic.                                                                                                                                                                                                                         | Page4/Line109-113                   | Introduction/Paragraph3       |
| <b>METHODS</b>            |         |                                                                                                                                                                                                                                                                                      |                                     |                               |
| Research selection        | 5       | Specify the process for identifying the literature search (eg, years considered, language, publication status, study design, and databases of coverage).                                                                                                                             | Page4/Line113-115                   | Methods/Paragraph1            |
| <b>DISCUSSION/SUMMARY</b> |         |                                                                                                                                                                                                                                                                                      |                                     |                               |
| Narrative                 | 6       | Discuss: 1) research reviewed including fundamental or key findings, 2) limitations and/or quality of research reviewed, and 3) need for future research.                                                                                                                            | Page4-11/Line117-342                | Discussion/Paragraph1-9       |
| Summary                   | 7       | Provide an overall interpretation of the narrative review in the context of clinical practice and/or the Nutrition Care Process for registered dietitian nutritionists, clinical practice for other health professionals, policy development and implementation, or future research. | Page11/Line346-353                  | Discussion/Paragraph1         |

Article Information: <http://dx.doi.org/10.21037/atm-20-7243>

\*As the checklist was provided upon initial submission, the page number/line number reported may be changed due to copyediting and may not be referable in the published version. In this case, the section/paragraph may be used as an alternative reference.
